# Supplementary material for: Effects of Co-Varying Diel-Cycling Hypoxia and pH on Growth in the Juvenile Eastern Oyster, Crassostrea virginica
Source: PLoS One. 2016 Aug 22;11(8):e0161088. doi: 10.1371/journal.pone.0161088 (PMC4993518; doi:10.1371/journal.pone.0161088)
Supplement: S2 Table — (XLSX) [file pone.0161088.s002.xlsx]

## Sheet: 2013
				Mean			Count			Standard Error
Year	Settlement	DO/pH Treatment	Replicate	Instantaneous Growth_First Half	Instantaneous Growth_Second Half	Shell Area_Endpoint	Instantaneous Growth_First Half	Instantaneous Growth_Second Half	Shell Area_Endpoint	Instantaneous Growth_First Half	Instantaneous Growth_Second Half	Shell Area_Endpoint
2013	4-weeks prior	Severe cycling hypoxia, normocapnia	blue	0.14154	0.0454	501.256	3	3	3	0.01005	0.007403	50.4447
2013	4-weeks prior	Severe cycling hypoxia, normocapnia	green	0.19742	0.04762	453.37	3	3	3	0.009707	0.014583	130.109
2013	4-weeks prior	Severe cycling hypoxia, normocapnia	orange	0.16577	0.03909	817.018	4	4	4	0.022098	0.004747	91.9692
2013	4-weeks prior	Severe cycling hypoxia, normocapnia	red	0.17821	0.02671	630.514	6	5	5	0.014554	0.003423	90.9316
2013	4-weeks prior	Severe cycling hypoxia, normocapnia	yellow	.	.	.	0	0	0	.	.	.
2013	4-weeks prior	Severe cycling hypoxia, cycling pH	blue	0.14903	0.04126	543.36	2	2	2	0.044591	0.009319	103.59
2013	4-weeks prior	Severe cycling hypoxia, cycling pH	green	0.14677	0.03605	651.247	3	3	3	0.013117	0.005546	123.989
2013	4-weeks prior	Severe cycling hypoxia, cycling pH	orange	0.15838	0.04001	666.713	4	2	2	0.010805	0.010684	30.9785
2013	4-weeks prior	Severe cycling hypoxia, cycling pH	red	0.15736	0.03721	703	2	2	2	0.023409	0.001782	123.168
2013	4-weeks prior	Severe cycling hypoxia, cycling pH	yellow	0.21822	0.04011	467.649	2	2	2	0.010163	0.006967	50.2725
2013	4-weeks prior	Constant hypoxia, normocapnia	blue	0.11834	0.04119	219.431	2	2	2	0.02686	0.017547	24.534
2013	4-weeks prior	Constant hypoxia, normocapnia	green	0.10875	0.02745	409.163	3	3	3	0.007225	0.001895	31.4825
2013	4-weeks prior	Constant hypoxia, normocapnia	orange	0.10776	0.02742	104.493	1	1	1	.	.	.
2013	4-weeks prior	Constant hypoxia, normocapnia	red	0.10198	0.01883	376.199	5	3	3	0.02393	0.002554	7.39955
2013	4-weeks prior	Constant hypoxia, normocapnia	yellow	0.12358	0.03279	257.983	2	3	3	0.000441	0.01475	55.512
2013	4-weeks prior	Moderate cycling hypoxia, normocapnia	blue	0.18389	0.03728	818.601	2	1	1	0.010695	.	.
2013	4-weeks prior	Moderate cycling hypoxia, normocapnia	green	0.16338	0.02556	443.236	2	2	2	0.011537	0.004107	18.9425
2013	4-weeks prior	Moderate cycling hypoxia, normocapnia	orange	0.13117	0.05458	375.182	3	3	4	0.042679	0.018378	97.4777
2013	4-weeks prior	Moderate cycling hypoxia, normocapnia	red	0.12826	0.05238	569.009	3	3	3	0.018075	0.018068	86.4306
2013	4-weeks prior	Moderate cycling hypoxia, normocapnia	yellow	0.18433	0.04028	477.603	3	2	2	0.024449	0.001269	61.8385
2013	4-weeks prior	Normoxia, constant moderate pH	blue	0.2141	0.03975	786.955	3	1	1	0.015828	.	.
2013	4-weeks prior	Normoxia, constant moderate pH	green	0.17608	0.0637	456.537	2	1	1	0.059544	.	.
2013	4-weeks prior	Normoxia, constant moderate pH	orange	0.16335	0.03425	517.088	3	3	3	0.030962	0.00923	130.096
2013	4-weeks prior	Normoxia, constant moderate pH	red	0.17091	0.0321	473.512	6	6	6	0.015158	0.00518	63.5573
2013	4-weeks prior	Normoxia, constant moderate pH	yellow	0.18087	0.05761	657.449	2	2	3	0.0376	0.000237	51.9739
2013	4-weeks prior	Normoxia, normocapnia	blue	0.1138	0.01569	363.259	4	1	1	0.005264	.	.
2013	4-weeks prior	Normoxia, normocapnia	green	0.21915	0.02404	555.263	2	1	3	0.008773	.	28.8332
2013	4-weeks prior	Normoxia, normocapnia	orange	0.17533	0.05066	532.704	4	3	3	0.030182	0.017049	37.9053
2013	4-weeks prior	Normoxia, normocapnia	red	0.1113	0.01387	363.611	3	2	2	0.012872	0.023018	67.1645
2013	4-weeks prior	Normoxia, normocapnia	yellow	0.14094	0.09326	741.66	3	3	3	0.04159	0.036724	95.6629
2013	4-weeks prior	Normoxia, cycling pH	blue	0.19409	0.0129	569.545	2	1	2	0.052881	.	208.309
2013	4-weeks prior	Normoxia, cycling pH	green	0.16387	0.04854	748.798	2	1	1	0.003523	.	.
2013	4-weeks prior	Normoxia, cycling pH	orange	0.18883	0.029	500.874	5	5	5	0.019815	0.017611	83.7988
2013	4-weeks prior	Normoxia, cycling pH	red	0.13385	0.02388	549.353	4	2	3	0.009815	0.00084	138.894
2013	4-weeks prior	Normoxia, cycling pH	yellow	0.21702	0.09071	960.702	3	2	2	0.004391	0.014105	13.8125
2013	2-weeks prior	Severe cycling hypoxia, normocapnia	blue	0.22712	0.0409	360.794	12	12	12	0.009324	0.007322	17.3685
2013	2-weeks prior	Severe cycling hypoxia, normocapnia	green	0.23476	0.04396	455.29	7	6	6	0.010216	0.005582	58.5372
2013	2-weeks prior	Severe cycling hypoxia, normocapnia	orange	0.2047	0.04554	457.286	5	2	2	0.010248	0.014674	33.5525
2013	2-weeks prior	Severe cycling hypoxia, normocapnia	red	0.23284	0.04948	452.549	6	5	5	0.012092	0.009482	49.2909
2013	2-weeks prior	Severe cycling hypoxia, normocapnia	yellow	0.17359	0.06156	322.887	6	6	6	0.021873	0.009141	69.09
2013	2-weeks prior	Severe cycling hypoxia, cycling pH	blue	0.19135	0.05628	426.968	10	7	7	0.022493	0.018787	46.5065
2013	2-weeks prior	Severe cycling hypoxia, cycling pH	green	0.2137	0.06425	582.393	8	6	6	0.006617	0.012946	51.5486
2013	2-weeks prior	Severe cycling hypoxia, cycling pH	orange	0.20608	0.04398	276.646	5	5	5	0.012635	0.009295	41.7434
2013	2-weeks prior	Severe cycling hypoxia, cycling pH	red	0.20034	0.05733	411.518	5	3	4	0.008087	0.010192	25.1403
2013	2-weeks prior	Severe cycling hypoxia, cycling pH	yellow	0.18926	0.0563	468.408	6	5	7	0.019414	0.008405	57.6435
2013	2-weeks prior	Constant hypoxia, normocapnia	blue	0.18764	0.04383	226.232	7	6	6	0.021723	0.023692	15.579
2013	2-weeks prior	Constant hypoxia, normocapnia	green	0.14809	0.07329	257.91	8	7	7	0.012795	0.00858	20.0463
2013	2-weeks prior	Constant hypoxia, normocapnia	orange	0.16336	0.02361	120.042	4	4	5	0.013372	0.01296	12.3734
2013	2-weeks prior	Constant hypoxia, normocapnia	red	0.16749	.	.	6	0	0	0.023824	.	.
2013	2-weeks prior	Constant hypoxia, normocapnia	yellow	0.16575	0.03832	196.332	5	3	5	0.034861	0.010266	26.6137
2013	2-weeks prior	Moderate cycling hypoxia, normocapnia	blue	0.1978	0.05785	440.309	9	8	9	0.011747	0.011149	38.2068
2013	2-weeks prior	Moderate cycling hypoxia, normocapnia	green	0.20235	0.05586	409.458	10	7	7	0.006885	0.006603	30.9887
2013	2-weeks prior	Moderate cycling hypoxia, normocapnia	orange	0.20454	0.05405	539.124	2	2	3	0.0012	0.018353	66.7951
2013	2-weeks prior	Moderate cycling hypoxia, normocapnia	red	0.24043	0.03743	562.018	4	2	4	0.003938	0.001305	79.887
2013	2-weeks prior	Moderate cycling hypoxia, normocapnia	yellow	0.23858	0.04872	551.446	6	3	3	0.008336	0.0012	119.334
2013	2-weeks prior	Normoxia, constant moderate pH	blue	0.16455	0.10549	541.775	3	3	8	0.078094	0.067498	50.8796
2013	2-weeks prior	Normoxia, constant moderate pH	green	0.22376	0.04291	508.205	3	3	4	0.021774	0.009959	31.0922
2013	2-weeks prior	Normoxia, constant moderate pH	orange	0.2247	0.05348	480.474	6	5	5	0.01473	0.014056	63.9065
2013	2-weeks prior	Normoxia, constant moderate pH	red	0.1766	0.02743	329.848	5	3	3	0.021665	0.02719	185.658
2013	2-weeks prior	Normoxia, constant moderate pH	yellow	0.22892	0.04915	457.849	7	5	5	0.011839	0.018184	66.4462
2013	2-weeks prior	Normoxia, normocapnia	blue	0.22438	0.04362	448.211	7	7	7	0.012801	0.011622	69.0025
2013	2-weeks prior	Normoxia, normocapnia	green	0.18552	0.06107	353.891	9	4	5	0.015652	0.013659	45.7051
2013	2-weeks prior	Normoxia, normocapnia	orange	0.20791	0.03666	374.036	7	6	6	0.010288	0.011795	71.4746
2013	2-weeks prior	Normoxia, normocapnia	red	0.212	0.03211	493.063	4	4	5	0.01845	0.011139	79.5588
2013	2-weeks prior	Normoxia, normocapnia	yellow	0.23817	0.06756	731.745	7	6	6	0.014627	0.010985	41.0778
2013	2-weeks prior	Normoxia, cycling pH	blue	0.23171	0.05071	536.454	9	7	7	0.009372	0.006901	36.7417
2013	2-weeks prior	Normoxia, cycling pH	green	0.23798	0.04822	606.738	9	6	6	0.008538	0.002443	60.9213
2013	2-weeks prior	Normoxia, cycling pH	orange	0.20371	0.05021	474.413	5	5	6	0.015005	0.016349	24.9683
2013	2-weeks prior	Normoxia, cycling pH	red	0.21836	0.05186	476.801	10	4	4	0.009654	0.01249	80.2454
2013	2-weeks prior	Normoxia, cycling pH	yellow	0.18462	0.07155	530.939	7	6	6	0.023854	0.013162	45.4545
2013	1-week prior	Severe cycling hypoxia, normocapnia	blue	0.2503	0.06261	330.191	11	6	6	0.004424	0.005234	36.6145
2013	1-week prior	Severe cycling hypoxia, normocapnia	green	0.24871	0.07325	365.432	14	4	4	0.005976	0.017044	81.1242
2013	1-week prior	Severe cycling hypoxia, normocapnia	orange	0.25645	0.04544	333.098	9	7	7	0.004714	0.014839	63.3239
2013	1-week prior	Severe cycling hypoxia, normocapnia	red	0.24537	0.05044	266.444	16	11	11	0.006708	0.013504	35.7539
2013	1-week prior	Severe cycling hypoxia, normocapnia	yellow	0.24117	0.04394	218.078	19	9	9	0.004245	0.006074	18.7144
2013	1-week prior	Severe cycling hypoxia, cycling pH	blue	0.25045	0.0407	264.649	9	8	8	0.006832	0.013062	48.404
2013	1-week prior	Severe cycling hypoxia, cycling pH	green	0.26464	0.06415	478.112	14	12	12	0.004873	0.004246	15.4841
2013	1-week prior	Severe cycling hypoxia, cycling pH	orange	0.24891	0.05818	325.234	14	9	9	0.004487	0.009575	35.2826
2013	1-week prior	Severe cycling hypoxia, cycling pH	red	0.23445	0.08335	348.981	14	7	7	0.007182	0.011349	41.9365
2013	1-week prior	Constant hypoxia, normocapnia	blue	0.21761	0.04388	131.437	6	6	6	0.003766	0.005745	16.352
2013	1-week prior	Constant hypoxia, normocapnia	green	0.22361	0.05465	183.429	13	9	9	0.004851	0.00551	14.2857
2013	1-week prior	Constant hypoxia, normocapnia	orange	0.20897	0.06614	196.666	14	10	10	0.009292	0.009211	17.0865
2013	1-week prior	Constant hypoxia, normocapnia	red	0.20249	0.05803	147.716	10	8	8	0.008061	0.008395	22.3303
2013	1-week prior	Constant hypoxia, normocapnia	yellow	0.22991	0.0417	162.203	19	15	15	0.006104	0.007409	18.0806
2013	1-week prior	Moderate cycling hypoxia, normocapnia	blue	0.2484	0.07085	392.61	5	5	5	0.004015	0.004577	31.4489
2013	1-week prior	Moderate cycling hypoxia, normocapnia	green	0.25666	0.05578	372.345	15	10	10	0.004528	0.004089	22.4147
2013	1-week prior	Moderate cycling hypoxia, normocapnia	orange	0.24776	0.0518	292.548	16	6	6	0.006561	0.014434	42.8657
2013	1-week prior	Moderate cycling hypoxia, normocapnia	red	0.25689	0.06142	352.642	11	3	3	0.006647	0.017647	39.2059
2013	1-week prior	Moderate cycling hypoxia, normocapnia	yellow	0.25778	0.06986	361.563	15	5	5	0.007659	0.026329	67.5276
2013	1-week prior	Normoxia, constant moderate pH	blue	0.24241	0.05578	277.234	13	6	6	0.006726	0.007027	66.1205
2013	1-week prior	Normoxia, constant moderate pH	green	0.2469	0.072	364.015	13	4	4	0.005806	0.012616	56.9087
2013	1-week prior	Normoxia, constant moderate pH	orange	0.25463	0.06076	318.622	11	5	5	0.009536	0.013767	87.5886
2013	1-week prior	Normoxia, constant moderate pH	red	0.25854	0.0588	425.039	14	12	12	0.003901	0.00681	51.6168
2013	1-week prior	Normoxia, constant moderate pH	yellow	0.24963	0.08184	437.97	18	9	9	0.00902	0.013256	39.4448
2013	1-week prior	Normoxia, normocapnia	blue	0.247	0.08968	557.991	7	6	6	0.010604	0.013148	38.107
2013	1-week prior	Normoxia, normocapnia	green	0.23512	0.06226	317	12	7	7	0.010501	0.013735	39.8438
2013	1-week prior	Normoxia, normocapnia	orange	0.27239	0.06106	546.227	15	4	4	0.004236	0.006974	29.4516
2013	1-week prior	Normoxia, normocapnia	red	0.26296	0.01632	237.943	13	5	5	0.010565	0.010649	64.1282
2013	1-week prior	Normoxia, normocapnia	yellow	0.26644	0.0655	460.87	18	6	6	0.003701	0.011359	36.937
2013	1-week prior	Normoxia, cycling pH	blue	0.27121	0.06246	389.686	8	3	3	0.007757	0.011677	33.1151
2013	1-week prior	Normoxia, cycling pH	green	0.26387	0.07119	511.683	14	7	7	0.005925	0.005497	54.079
2013	1-week prior	Normoxia, cycling pH	orange	0.26173	0.04667	350.497	21	10	10	0.003396	0.010192	49.5718
2013	1-week prior	Normoxia, cycling pH	red	0.26397	0.06955	444.366	13	6	6	0.005988	0.010096	38.6461
2013	1-week prior	Normoxia, cycling pH	yellow	0.26731	0.05128	410.384	14	11	11	0.004587	0.008058	51.4856
